# Supplementary material for: A randomized controlled trial to assess the efficacy and cost-effectiveness of urinary catheters with silver alloy coating in spinal cord injured patients: trial protocol
Source: BMC Urol. 2013 Jul 30;13:38. doi: 10.1186/1471-2490-13-38 (PMC3735409; doi:10.1186/1471-2490-13-38)
Supplement: Additional file 1: Table S1 — ESCALE Group. [file 1471-2490-13-38-S1.docx]

Additional file 1

ESCALE Group

| Principal Investigator | Xavier Bonfill Cosp | Iberoamerican Cochrane Centre |
| --- | --- | --- |
| Study Coordination | David Rigau | Iberoamerican Cochrane Centre |
| María José Martínez Zapata | Iberoamerican Cochrane Centre |
| Investigators  *(alphabetical order)* | Carolina María Alemán Sánchez | Complejo Hospitalario Universitario Insular – Materno Infantil de Canarias |
| Cruz Almuiña Díaz | Complexo Hospitalario Universitario A Coruña |
| Ervin Amaya | Hospital de Neurorrehabilitación - Instituto Guttmann |
| Lourdes Antolín Horno | Hospital Universitario Miguel Servet |
| Enrique Bárbara Bataller | Complejo Hospitalario Universitario Insular – Materno Infantil de Canarias |
| Juana María Barrera Chacón | Hospital Universitario Virgen del Rocío |
| Manuel Bea Muñoz | Hospital Universitario Central de Asturias |
| Jesús Benito | Hospital de Neurorrehabilitación - Instituto Guttmann |
| Aníbal Blanco Vivo | Hospital Universitario Puerta del Mar |
| Albert Borau Duran | Hospital de Neurorrehabilitación - Instituto Guttmann |
| Nora Cívicos Sánchez | Hospital Universitario Cruces |
| Montserrat Cuadrado Rebollares | Hospital Universitario Cruces |
| Manuel Florencio de la Marta García | Hospital Nacional de Parapléjicos de Toledo |
| Juan Gabriel de los Ríos | Hospital de Neurorrehabilitación - Instituto Guttmann |
| Juan Ramón Espinosa Quiros | Hospital Universitario Puerta del Mar |
| Manuel Esteban Fuertes | Hospital Nacional de Parapléjicos de Toledo |
| Mª Elena Ferreiro Velasco | Complexo Hospitalario Universitario A Coruña |
| Inmaculada García Obrero | Hospital Universitario Virgen del Rocío |
| Mónica Garrán Díaz | Hospital Universitario Central de Asturias |
| Mónica González Nuño | Hospital Universitario La Paz |
| Ena Eva Granados Matute | Hospital Universitario Virgen del Rocío |
| Mari Paz Herederos | Hospital de Neurorrehabilitación - Instituto Guttmann |
| Ricardo Hermida Pérez | Hospital Universitario Puerta del Mar |
| María Luisa Jauregui Abrisqueta | Hospital Universitario Cruces |
| Luis Ledesma Romano | Hospital Universitario Miguel Servet |
| Inés Lodeiro Mendieta | Hospital Universitario Cruces |
| Antonio López García Moreno | Hospital Nacional de Parapléjicos de Toledo |
| Bosco Méndez Ferrer | Hospital Universitario Virgen del Rocío |
| Antonio Montoto Marqués | Complexo Hospitalario Universitario A Coruña |
| Susana Moraleda Pérez | Hospital Universitario La Paz |
| Montse Morcillo | Hospital de Neurorrehabilitación - Instituto Guttmann |
| Teresa Ayala Ortiz de Solorzano | Hospital Universitario Miguel Servet |
| Ana Luz Peña Florez | Hospital Universitario Miguel Servet |
| Francisco Pineda Rivero | Hospital Universitario Miguel Servet |
| Ricardo Piñeiro Rojas | Hospital Universitario Virgen del Rocío |
| Fátima Quintana Suárez | Complejo Hospitalario Universitario Insular – Materno Infantil de Canarias |
| Francisco Reche Pérez | Hospital Universitario Puerta del Mar |
| Antonio Rodríguez Sotillo | Complexo Hospitalario Universitario A Coruña |
| Francisco Javier Salguero Ruiz | Hospital Universitario Puerta del Mar |
| Sebastián Salvador de la Barrera | Complexo Hospitalario Universitario A Coruña |
| Catalina Silvestre Agudelo | Hospital Universitario Miguel Servet |
| Joan Vidal | Hospital de Neurorrehabilitación - Instituto Guttmann |
| Miguel Virseda Chamorro | Hospital Nacional de Parapléjicos de Toledo |
| María José Zarco Periñan | Hospital Universitario Virgen del Rocío |
